# Supplementary material
Source: PubMed Central journal article supplement (PMC2342599)
Supplement: jphysiol_2002.031369_1.pdf [file jphysiol_2002.031369_1.pdf]

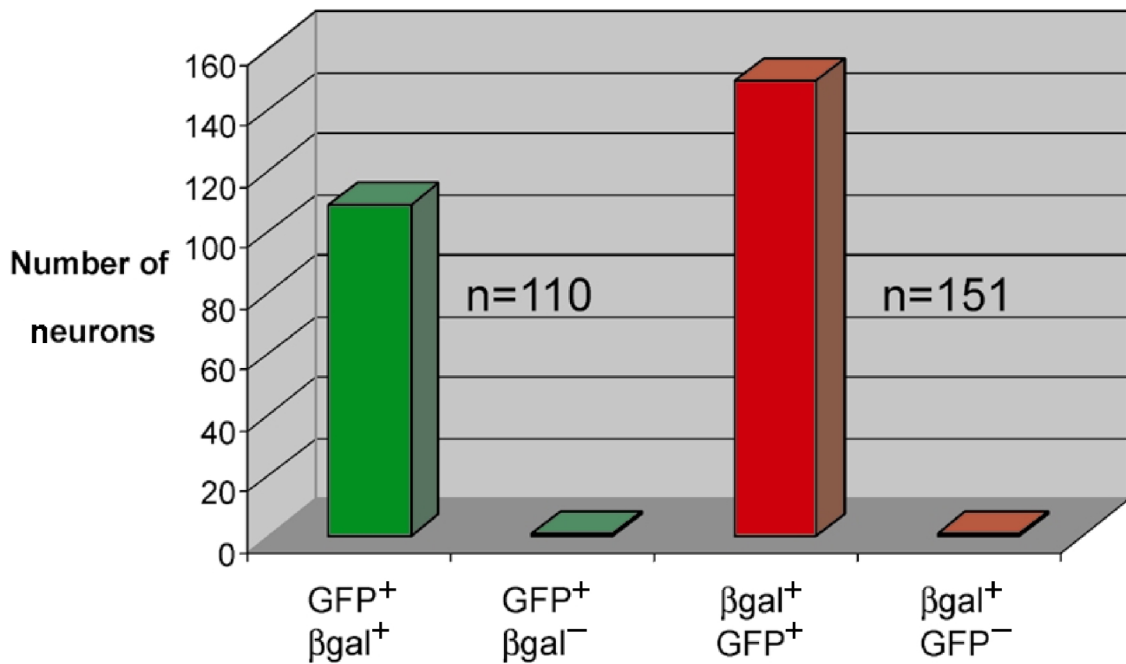

**Supplementary information.** Coexpression of EGFP and  $\beta$ -gal by neurons in cultured cortical slices. ‘Bullets’ were coated with EGFP and  $\beta$ -gal in pcDNA3.1 at a 1:1 ratio. After 2 days in culture, slices were processed for immunocytochemistry using anti- $\beta$ -gal and Cy3 as a fluorochrome. We examined 110 GFP<sup>+</sup> cells and then assessed whether these cells were also  $\beta$ -gal<sup>+</sup>. Then we examined 151  $\beta$ -gal<sup>+</sup> cells and determined whether these cells were GFP<sup>+</sup>. There was an almost perfect correspondence between  $\beta$ -gal<sup>+</sup> and GFP<sup>+</sup> cells.
